# Supplementary material for: Dietary Fiber Deficiency Accelerates Colitis in Mice in the Short Term Independent of Short-Chain Fatty Acids
Source: MDPI journal article supplement (doi:10.3390/gastroent15030052), 2024-08-21
Supplement: s1 [file Supplemental Tables.pdf › Supplemental Tables.pdf]

**Table S1. Composition of FF**

|              | ND          | FF   |
|--------------|-------------|------|
| Fibre        | 3.3         | 0    |
| Fat          | 4.9         | 4    |
| Protein      | 23.2        | 20   |
| Carbohydrate | 54.7        | 71   |
| Kcal/100g    | 355.7       | 400  |
| Casein       | Undisclosed | 20   |
| Fructose     | Undisclosed | 0    |
| Dextrose     | Undisclosed | 60.4 |
| Sucrose      | Undisclosed | 9.6  |
| Cellulose    | Undisclosed | 0    |
| Soybean Oil  | Undisclosed | 2.5  |
| Lard         | Undisclosed | 2    |
| Cholesterol  | 0.08        | 0    |
| Kcal/100g    | 355.7       | 400  |

**Table S2. Scoring criteria of disease activity index (DAI)**

| Score | Weight loss | Diarrhea                           | Rectal bleeding            |
|-------|-------------|------------------------------------|----------------------------|
| 0     | No loss     | Normal                             | Normal                     |
| 1     | -5%         | Soft stool                         | Slight blood smeared stool |
| 2     | 5 - 10 %    | Very soft<br>with keeping<br>shape | Red                        |
| 3     | > 10 %      | watery stool                       | state between 2 to 4       |
| 4     | -           | -                                  | Gross Bleeding             |

**Table S3. Scoring criteria of histopathology**

| Score | crypt architecture                                 | degree of inflammatory cell infiltration | muscle thickening                            | goblet cell depletion | Epithelial damage                             |
|-------|----------------------------------------------------|------------------------------------------|----------------------------------------------|-----------------------|-----------------------------------------------|
| 0     | normal                                             | normal                                   | base of crypt sits on the muscularis mucosae | absent                | absent                                        |
| 1     | mild                                               | mild                                     | mild                                         | present               | mild disturbance of the epidermis             |
| 2     | moderate                                           | moderate                                 | moderate                                     | -                     | disturbance of the epidermis in multiple area |
| 3     | severe crypt distortion with loss of entire crypts | dense inflammatory infiltrate            | marked muscle thickening                     | -                     | edvident disruption of epidermis              |
